# Supplementary material for: Brain Atrophy and White Matter Damage Linked to Peripheral Bioenergetic Deficits in the Neurodegenerative Disease FXTAS
Source: MDPI journal article supplement (doi:10.3390/ijms22179171), 2021-08-25
Supplement: s1 [file s1]

## Supplementary Material

**Brain atrophy and white matter damage linked to peripheral bioenergetic deficits in the neurodegenerative disease FXTAS**, by Wang/Napoli, et al.

**Table S1.** Correlations between WMHV, BV, peripheral mitochondrial outcomes and FXTAS stage adjusted for sex\*\*

| Outcome                                      | $\beta$ | SD    | <i>P</i> -Value |
|----------------------------------------------|---------|-------|-----------------|
| WMHV                                         | 0.439   | 0.101 | < 0.001         |
| BV                                           | -2.706  | 2.050 | 0.191           |
| Log citrate synthase activity                | 0.025   | 0.178 | 0.888           |
| Log NADH-linked ATP production*              | -0.081  | 0.189 | 0.671           |
| Log FADH <sub>2</sub> -linked ATP production | -0.150  | 0.156 | 0.340           |
| Log glycerophosphate-linked ATP production   | -0.052  | 0.151 | 0.734           |
| Log cytochrome <i>c</i> oxidase activity     | -0.252  | 0.201 | 0.214           |
| Log glucose-Gln-fueled ATP production        | -0.006  | 0.134 | 0.965           |
| Log RCRu                                     | -0.463  | 0.260 | 0.079           |
| Log SRC                                      | -0.403  | 0.293 | 0.173           |
| Log ROS/PL                                   | 0.219   | 0.239 | 0.362           |
| IRC                                          | -0.296  | 0.487 | 0.545           |
| RCR                                          | -0.266  | 0.173 | 0.129           |

\*ATP production stands for oxygen-linked ATP production.

\*\* All abbreviations were spelled out in the main text and Methods.
